# Supplementary material
Source: PubMed Central journal article supplement (PMC7493225)
Supplement: ez0c00090_si_001.pdf [file ez0c00090_si_001.pdf]

## Supporting Information

### Complex Mixtures of Chlorinated Paraffins Found in Hand Wipes of a Norwegian Cohort

Bo Yuan,<sup>1,\*</sup> Joo Hui Tay,<sup>1,†</sup> Eleni Papadopoulou,<sup>2</sup> Line Småstuen Haug,<sup>2</sup> Juan Antonio Padilla-Sánchez,<sup>2</sup> and Cynthia A. de Wit<sup>1</sup>

<sup>1</sup> Department of Environmental Science, Stockholm University, SE-10691 Stockholm, Sweden;

<sup>2</sup> Section for Environmental Exposure and Epidemiology, Norwegian Institute of Public Health, P.O. Box 222, Skøyen, NO-0213 Oslo, Norway

<sup>†</sup> Current address: Faculty of Industrial Sciences & Technology (FIST), Universiti Malaysia Pahang (UMP), Lebuhraya Tun Razak, 26300 Gambang, Kuantan, Pahang, Malaysia.

\* Corresponding author:

Bo Yuan  
Department of Environmental Science  
Stockholm University  
Svante Arrhenius väg 8, Stockholm, SE-106 91 Sweden  
Tel: 0046 8 674 7315  
Fax: 0046 8 674 7638  
E-mail: [bo.yuan@aces.su.se](mailto:bo.yuan@aces.su.se)

## **Sample collection and storage**

The participants were advised to keep their hands unwashed for at least 60 min before collecting the hand wipes. Two sterile gauze pads (3×3 in., Swift First Aid Inc. Valencia, CA, USA) were immersed in 3 mL isopropanol and then used to wipe the palm and the back of both hands, respectively, from wrist to fingertips. Left and right hands were sampled separately but extracted and analyzed together, providing one measurement per participant. Both pieces of gauze pad were stored in a 60 mL amber glass jar at −20 °C until analysis. Field blank samples were taken by soaking a gauze pad in isopropanol and placing it directly into a glass jar. After sample collection, the participants were asked to complete a questionnaire regarding indoor environment characteristics, type and number of consumer products, as well as some personal behaviors. Within a 2-day collection period, the participants collected 4 sets of hand wipes, during the first visit in Day 1, in the evening of Day 1, in the morning of Day 2 and before lunch in Day 2. The sample analyzed in the current study was the last collected sample. A total of 60 hand wipe samples and 15 field blanks (two field blanks were lost in the analytical process) were collected from 60 participants for CP analysis.

## **Instrumental analysis**

APCI-Orbitrap-HRMS (Q Exactive, Thermo Fisher Scientific, San Jose, USA) was operated in full-scan mode ( $m/z$  250 – 2000) with a resolution of 120 000 FWHM. The instrumental settings were optimized using a SCCP mixture (51.5% Cl, 15 ng/ $\mu$ L) and a LCCP mixture (Witacolor 549, 49% Cl, 5 ng/ $\mu$ L) as follows: injection volume 3  $\mu$ L, mobile phase flow rate 0.100 mL/min, DCM flow rate 0.010 mL/min, capillary temperature 250 °C, Aux (auxiliary) gas heater temperature 250 °C, spray current 5.7  $\mu$ A, maximum IT (ion time) 250 ms, AGC (automatic gain control) target 5e6, sheath gas flow rate 17 arbs, and Aux gas flow rate 1 arb.

## **Uncertainty analysis of profile deconvolution used for CP quantification**

Quantification of CPs yield only a total concentration of the mixture as a single value. The criterion is that the reference mixture of CPs selected for quantification should have a carbon-chlorine profile as similar as possible with the profile in each sample,<sup>1</sup> otherwise, the deviation can be up to 1000%.<sup>2,3</sup> Bogdal et al.<sup>4</sup> quantified the similarity between the profiles of reference CPs and sample using the goodness of fit ( $R^2$ ), with  $R^2=1$  indicating a perfect fit and the least deviation. Both Bogdal et al.<sup>4</sup> and Brandsma et al.<sup>5</sup> defined  $R^2 = 0.50$  as a cut-off threshold for quantifying CPs based on an uncertainty test using different CP reference standards with known concentrations. The uncertainty test in our study (Figure S1) showed a mean deviation of 40% in quantification difference when  $R^2 = 0.50$ . The deviation seems to be within a reasonable range compared with mean deviations of 49-96% of SCCPs with presence of MCCPs in a recent interlaboratory study with participants from 18 countries.<sup>6</sup> Therefore, we continued using the criterion of  $R^2>0.50$  as the threshold of a valid quantification of CPs using profile deconvolution.

**Table S1.** Descriptive statistics for chemical contaminants measured in the same hand wipe samples.

|                  |           | Mass (ng/participant) |        |           | Reference                               |
|------------------|-----------|-----------------------|--------|-----------|-----------------------------------------|
|                  |           | mean                  | median | min-max   |                                         |
| CPs              | vSCCPs    | 1.3                   | <0.70  | <0.70-13  | Present study                           |
|                  | SCCPs     | 280                   | 160    | 22-2400   | Present study                           |
|                  | MCCPs     | 840                   | 490    | 33-7400   | Present study                           |
|                  | LCCPs     | 570                   | 150    | 10-8500   | Present study                           |
|                  | sumCPs    | 1700                  | 950    | 43-18000  | Present study                           |
| PBDEs            | sumPBDE   | 6.3                   | 2.9    | 0.44-64   | Tay et al. (2018) <sup>7</sup>          |
| HBCDDs           | sumHBCDD  | 680                   | 180    | 49-8900   | Tay et al. (2018) <sup>7</sup>          |
| EHFRs            | TBBPA     | 1300                  | 570    | <30-11000 | Tay et al. (2018) <sup>7</sup>          |
|                  | sumEHFR   | 1300                  | 570    | 31-11000  | Tay et al. (2018) <sup>7</sup>          |
| PFAS             | 6:2 diPAP | 3.3                   | 0.54   | -87       | Poonthong et al. (2019) <sup>8</sup>    |
|                  | 8:2 diPAP | 4.7                   | 0.41   | -213      | Poonthong et al. (2019) <sup>8</sup>    |
| OPEs             | ΣOPEs     |                       | 192    | 20-14100  | Xu et al. (2016) <sup>9</sup>           |
| phthalate esters | DEHP      |                       | 5570*  |           | Giovanoulis et al. (2018) <sup>10</sup> |
|                  | DiNP      |                       | 5690*  |           | Giovanoulis et al. (2018) <sup>10</sup> |
|                  | DPHP      |                       | 360*   |           | Giovanoulis et al. (2018) <sup>10</sup> |

PFAS: Perfluoroalkyl Substances; EHFRs: Emerging halogenated flame retardants; PAP: Polyfluoroalkyl phosphate ester; OPEs: Organophosphate ester. TBBPA and diPAP were the most abundant EHFRs and PFAs, respectively, found in the hand wipes, which were thus included in the table.

\*unit: pg/cm<sup>2</sup>

**Table S2.** Relative contributions of chlorinated paraffin standards in pattern reconstruction of individual hand wipe samples.

| <i>Sample</i> | <i>R</i> <sup>2</sup> | <i>Relative contributions from SCCP products</i> |                          |                          |                        |                     | <i>Relative contributions from MCCP products</i> |                        |                        |                          |                        |                         |                     | <i>Relative contributions from LCCP products</i> |                        |                       |                     |                            |
|---------------|-----------------------|--------------------------------------------------|--------------------------|--------------------------|------------------------|---------------------|--------------------------------------------------|------------------------|------------------------|--------------------------|------------------------|-------------------------|---------------------|--------------------------------------------------|------------------------|-----------------------|---------------------|----------------------------|
|               |                       | <i>Witacolor<br/>149</i>                         | <i>SCCP<br/>51.5% Cl</i> | <i>SCCP<br/>55.5% Cl</i> | <i>SCCP<br/>63% Cl</i> | <i>Hüls<br/>70C</i> | <i>MCCP<br/>42% Cl</i>                           | <i>MCCP<br/>52% Cl</i> | <i>MCCP<br/>57% Cl</i> | <i>Cloparin<br/>49st</i> | <i>Cloparin<br/>50</i> | <i>Cereclor<br/>S52</i> | <i>Hüls<br/>52G</i> | <i>LCCP<br/>36% Cl</i>                           | <i>LCCP<br/>49% Cl</i> | <i>Uniclor<br/>40</i> | <i>Hüls<br/>40N</i> | <i>Witacolor<br/>VP549</i> |
| HW01          | 0.58                  | 1%                                               | 9%                       |                          | 5%                     |                     | 37%                                              | 1%                     | 20%                    | 15%                      | 1%                     | 4%                      | 0%                  | 2%                                               | 0%                     | 1%                    | 2%                  | 0%                         |
| HW02          | 0.83                  | 1%                                               | 12%                      |                          | 4%                     |                     | 20%                                              | 1%                     | 8%                     | 30%                      | 2%                     | 15%                     |                     | 6%                                               | 0%                     |                       | 1%                  | 0%                         |
| HW03          | 0.70                  | 1%                                               | 2%                       | 0%                       | 1%                     |                     | 19%                                              |                        |                        | 29%                      |                        |                         |                     | 38%                                              | 0%                     | 1%                    | 9%                  | 0%                         |
| HW04          | 0.79                  |                                                  | 0%                       | 0%                       | 0%                     |                     | 0%                                               | 74%                    | 25%                    | 0%                       |                        |                         |                     | 0%                                               | 0%                     | 0%                    | 0%                  | 0%                         |
| HW05          | 0.83                  | 1%                                               | 9%                       |                          | 5%                     |                     | 30%                                              | 1%                     | 11%                    | 12%                      | 1%                     | 3%                      | 0%                  | 22%                                              | 0%                     | 1%                    | 3%                  | 0%                         |
| HW06          | 0.72                  | 1%                                               | 0%                       |                          | 1%                     |                     | 18%                                              | 1%                     | 0%                     | 3%                       | 1%                     | 2%                      | 1%                  | 68%                                              | 0%                     | 1%                    | 4%                  | 0%                         |
| HW07          | 0.78                  | 1%                                               | 3%                       | 8%                       | 3%                     |                     | 46%                                              | 1%                     | 7%                     | 18%                      | 1%                     | 0%                      | 0%                  | 11%                                              | 0%                     | 0%                    |                     | 0%                         |
| HW08          | 0.85                  |                                                  |                          | 27%                      | 5%                     |                     | 24%                                              | 4%                     | 15%                    |                          | 9%                     |                         | 12%                 |                                                  | 3%                     |                       |                     | 0%                         |
| HW09          | 0.88                  | 1%                                               | 5%                       | 3%                       | 0%                     | 0%                  | 25%                                              | 1%                     | 20%                    | 28%                      | 1%                     | 5%                      | 3%                  | 7%                                               | 0%                     | 1%                    | 1%                  | 0%                         |
| HW10          | 0.74                  | 1%                                               | 4%                       | 0%                       | 2%                     |                     | 58%                                              | 1%                     | 5%                     | 13%                      | 1%                     | 2%                      | 0%                  | 11%                                              | 0%                     | 1%                    | 2%                  | 0%                         |
| HW11          | 0.66                  | 1%                                               | 5%                       |                          | 5%                     |                     | 6%                                               | 1%                     |                        | 57%                      | 1%                     | 2%                      | 0%                  | 16%                                              | 0%                     | 1%                    | 2%                  | 0%                         |
| HW12          | 0.85                  | 1%                                               | 9%                       | 1%                       | 1%                     |                     | 33%                                              | 1%                     | 8%                     | 33%                      | 1%                     | 1%                      | 0%                  | 11%                                              | 0%                     | 1%                    | 0%                  | 0%                         |
| HW13          | 0.87                  | 1%                                               | 10%                      | 3%                       | 2%                     |                     | 24%                                              | 1%                     | 13%                    | 28%                      | 1%                     | 3%                      | 0%                  | 12%                                              | 0%                     | 1%                    | 1%                  | 0%                         |
| HW14          | 0.65                  | 0%                                               | 5%                       | 0%                       | 0%                     |                     | 28%                                              |                        | 18%                    | 37%                      | 1%                     |                         | 0%                  | 9%                                               | 0%                     | 1%                    | 1%                  | 0%                         |
| HW15          | 0.81                  | 1%                                               | 4%                       | 6%                       | 1%                     |                     | 5%                                               |                        | 11%                    | 58%                      | 1%                     |                         |                     | 8%                                               | 2%                     | 0%                    | 2%                  | 0%                         |
| HW16          | 0.84                  | 0%                                               | 4%                       | 2%                       | 1%                     |                     | 18%                                              |                        | 5%                     | 20%                      |                        | 20%                     | 24%                 | 6%                                               |                        | 0%                    | 1%                  | 0%                         |
| HW17          | 0.80                  | 1%                                               | 9%                       | 4%                       | 4%                     |                     | 31%                                              | 1%                     | 20%                    | 16%                      | 1%                     | 4%                      | 0%                  | 6%                                               | 0%                     | 1%                    | 2%                  | 0%                         |
| HW18          | 0.75                  | 0%                                               | 4%                       | 0%                       | 2%                     |                     | 36%                                              | 1%                     | 2%                     | 13%                      | 1%                     | 2%                      | 27%                 | 10%                                              | 0%                     | 1%                    | 1%                  | 0%                         |
| HW19          | 0.88                  | 1%                                               | 1%                       | 4%                       | 0%                     | 0%                  | 23%                                              | 1%                     | 15%                    | 20%                      | 1%                     | 4%                      | 14%                 | 14%                                              | 0%                     | 1%                    | 1%                  | 0%                         |
| HW20          | 0.61                  | 1%                                               | 4%                       | 4%                       | 2%                     |                     | 24%                                              | 1%                     | 47%                    | 7%                       | 1%                     | 6%                      |                     |                                                  | 0%                     | 1%                    | 1%                  | 0%                         |
| HW21          | 0.56                  | 1%                                               | 10%                      |                          | 5%                     |                     | 34%                                              | 1%                     | 20%                    | 16%                      | 1%                     | 4%                      | 0%                  | 3%                                               | 0%                     | 1%                    | 3%                  | 0%                         |
| HW22          | 0.89                  |                                                  | 13%                      | 3%                       | 3%                     |                     | 19%                                              | 7%                     | 11%                    | 23%                      | 4%                     | 3%                      | 0%                  | 10%                                              | 3%                     |                       | 1%                  | 1%                         |
| HW23          | 0.74                  | 1%                                               | 10%                      | 0%                       | 2%                     |                     | 36%                                              | 1%                     | 15%                    | 22%                      | 1%                     | 4%                      | 0%                  | 5%                                               | 0%                     | 1%                    | 1%                  | 0%                         |
| HW24          | 0.64                  | 1%                                               | 9%                       |                          | 5%                     |                     | 36%                                              | 1%                     | 23%                    | 15%                      | 1%                     | 5%                      |                     |                                                  | 0%                     | 1%                    | 3%                  | 0%                         |
| HW25          | 0.90                  |                                                  |                          | 31%                      | 2%                     |                     | 13%                                              | 6%                     | 16%                    |                          | 7%                     | 8%                      | 11%                 | 1%                                               | 3%                     |                       |                     | 1%                         |
| HW26          | 0.68                  | 1%                                               |                          |                          | 0%                     | 0%                  | 41%                                              | 1%                     | 11%                    | 23%                      | 1%                     | 4%                      | 14%                 | 0%                                               | 0%                     | 1%                    | 2%                  | 0%                         |
| HW27          | 0.80                  | 0%                                               | 1%                       | 2%                       | 1%                     |                     | 75%                                              |                        |                        | 18%                      |                        |                         | 0%                  | 3%                                               | 0%                     |                       |                     | 0%                         |
| HW28          | 0.62                  | 1%                                               | 9%                       | 0%                       | 2%                     |                     | 40%                                              | 1%                     | 15%                    | 20%                      | 1%                     | 4%                      | 0%                  | 5%                                               | 0%                     | 1%                    | 1%                  | 0%                         |

|      |      |    |     |     |    |    |     |     |     |     |    |     |     |     |    |     |     |    |
|------|------|----|-----|-----|----|----|-----|-----|-----|-----|----|-----|-----|-----|----|-----|-----|----|
| HW29 | 0.80 |    | 12% |     | 2% |    | 28% | 0%  | 15% | 28% |    |     | 14% | 0%  |    | 0%  | 0%  |    |
| HW30 | 0.82 | 1% | 9%  |     | 5% |    | 15% | 1%  | 15% | 14% | 1% | 4%  | 0%  | 29% | 0% | 1%  | 4%  | 0% |
| HW31 | 0.74 | 1% | 5%  | 8%  | 9% | 1% | 26% |     | 13% | 27% | 1% |     | 1%  | 5%  | 1% | 4%  |     | 0% |
| HW32 | 0.82 |    | 9%  | 5%  | 7% |    | 17% | 7%  | 16% | 2%  | 7% | 15% |     | 7%  | 5% |     |     | 1% |
| HW33 | 0.54 | 1% | 7%  |     | 5% |    | 35% | 1%  | 22% | 15% | 1% | 4%  | 0%  | 5%  | 0% | 1%  | 2%  | 0% |
| HW34 | 0.71 | 1% | 7%  | 0%  | 0% |    | 14% | 2%  | 9%  | 20% | 2% | 9%  |     | 31% | 1% | 1%  | 3%  | 0% |
| HW35 | 0.79 | 1% | 11% |     | 4% |    | 27% | 1%  | 19% | 18% | 1% | 5%  | 0%  | 9%  | 0% | 1%  | 3%  | 0% |
| HW36 | 0.70 | 1% | 9%  |     | 4% |    | 18% | 1%  | 17% | 34% | 1% | 6%  | 0%  | 6%  | 0% | 1%  | 2%  | 0% |
| HW37 | 0.85 |    | 16% |     | 1% |    | 14% | 1%  | 8%  | 38% | 4% |     |     | 6%  | 8% | 2%  | 1%  | 0% |
| HW38 | 0.92 |    | 5%  | 15% | 7% |    | 19% | 27% | 18% |     | 4% |     |     | 1%  | 4% |     | 0%  | 1% |
| HW39 | 0.71 | 1% | 9%  | 3%  | 6% |    | 29% | 1%  | 21% | 15% | 1% | 4%  |     | 5%  | 0% | 1%  | 2%  | 0% |
| HW40 | 0.81 | 1% | 6%  | 2%  | 4% |    | 9%  | 1%  | 18% | 28% | 1% | 3%  | 0%  | 25% | 0% | 0%  | 1%  | 0% |
| HW41 | 0.72 | 1% | 8%  | 4%  | 6% |    | 26% | 2%  | 26% | 15% | 1% | 6%  | 0%  | 2%  | 0% | 1%  | 1%  | 0% |
| HW42 | 0.51 | 3% | 1%  | 1%  | 0% |    | 31% | 3%  | 9%  | 14% | 3% | 2%  | 0%  | 22% | 1% | 2%  | 5%  | 0% |
| HW43 | 0.66 | 8% | 3%  | 5%  | 2% |    | 24% | 6%  | 3%  | 38% | 1% | 4%  |     | 2%  | 3% |     | 0%  |    |
| HW44 | 0.72 | 2% | 1%  | 0%  |    | 0% | 46% | 3%  |     | 11% | 2% | 26% |     | 5%  | 1% | 1%  | 0%  | 0% |
| HW45 | 0.88 |    | 8%  | 4%  | 2% |    | 19% | 5%  | 16% | 29% |    | 3%  |     | 5%  | 1% | 2%  | 5%  |    |
| HW46 | 0.60 | 1% | 8%  |     | 5% |    | 38% | 1%  | 13% | 13% | 1% | 4%  | 0%  | 11% | 0% | 1%  | 2%  | 0% |
| HW47 | 0.59 | 1% | 16% |     | 4% |    | 17% | 1%  | 27% | 16% | 1% | 5%  | 6%  |     | 0% | 1%  | 2%  | 0% |
| HW48 | 0.68 | 1% | 10% |     | 4% |    | 35% | 1%  | 18% | 19% | 1% | 4%  | 0%  | 3%  | 0% | 1%  | 2%  | 0% |
| HW49 | 0.73 | 1% | 6%  | 13% | 4% |    | 24% | 1%  | 11% | 9%  | 1% | 3%  | 14% | 10% | 0% | 1%  | 2%  | 0% |
| HW50 | 0.77 | 0% | 1%  | 0%  | 1% |    | 35% |     |     | 27% |    |     |     | 35% | 0% | 0%  | 0%  | 0% |
| HW51 | 0.60 | 1% |     | 0%  | 0% | 1% | 19% | 2%  | 10% | 54% | 2% | 9%  | 0%  |     | 0% | 1%  | 1%  | 0% |
| HW52 | 0.81 | 1% | 10% | 3%  | 3% |    | 13% | 1%  | 17% | 38% | 2% | 6%  |     | 2%  | 0% | 1%  | 2%  | 0% |
| HW53 | 0.69 | 1% | 12% | 0%  | 3% |    | 38% | 2%  | 12% | 16% | 1% | 9%  |     | 4%  | 0% | 2%  | 0%  | 0% |
| HW54 | 0.88 | 1% | 7%  | 2%  | 2% |    | 15% | 2%  | 12% | 34% | 2% | 13% |     | 8%  | 1% | 2%  | 0%  | 0% |
| HW55 | 0.78 | 1% | 7%  | 0%  | 4% |    | 35% | 1%  | 9%  | 14% | 1% | 3%  | 14% | 8%  | 0% | 1%  | 2%  | 0% |
| HW56 | 0.69 | 1% | 10% |     | 6% |    | 30% | 1%  | 21% | 14% | 1% | 4%  | 0%  | 7%  | 0% | 1%  | 3%  | 0% |
| HW57 | 0.53 | 1% | 4%  | 2%  |    | 1% | 42% | 1%  | 23% | 15% | 1% | 7%  |     |     | 0% | 1%  | 1%  | 0% |
| HW58 | 0.78 | 0% | 5%  |     | 3% | 0% | 32% | 1%  | 13% | 11% | 1% | 3%  | 25% | 6%  | 0% | 1%  | 1%  | 0% |
| HW59 | 0.69 | 5% | 2%  | 2%  | 0% | 0% | 0%  | 5%  | 18% |     | 5% | 18% |     |     | 1% | 15% | 27% | 1% |
| HW60 | 0.72 | 1% | 7%  | 0%  | 3% | 0% | 20% | 2%  | 18% | 30% | 1% | 10% |     | 4%  | 0% | 2%  | 1%  | 0% |

**Table S3.** Goodness of fit ( $R^2$ ) between congener group profile of vSCCPs in CP-52 and that profile in individual hand wipe samples.

| Sample | $R^2$             | Sample | $R^2$             | Sample | $R^2$             |
|--------|-------------------|--------|-------------------|--------|-------------------|
| HW01   | 0.97              | HW21   | –                 | HW41   | 0.80              |
| HW02   | – <sup>a</sup>    | HW22   | 0.96              | HW42   | –                 |
| HW03   | 0.44 <sup>b</sup> | HW23   | –                 | HW43   | 0.84              |
| HW04   | 0.75              | HW24   | 0.74              | HW44   | –                 |
| HW05   | –                 | HW25   | 0.43 <sup>b</sup> | HW45   | 0.69              |
| HW06   | –                 | HW26   | –                 | HW46   | –                 |
| HW07   | –                 | HW27   | 0.69              | HW47   | –                 |
| HW08   | –                 | HW28   | –                 | HW48   | –                 |
| HW09   | 0.89              | HW29   | 0.83              | HW49   | 0.73              |
| HW10   | –                 | HW30   | –                 | HW50   | –                 |
| HW11   | 0.42 <sup>b</sup> | HW31   | –                 | HW51   | –                 |
| HW12   | –                 | HW32   | –                 | HW52   | –                 |
| HW13   | –                 | HW33   | –                 | HW53   | –                 |
| HW14   | –                 | HW34   | –                 | HW54   | –                 |
| HW15   | 0.86              | HW35   | –                 | HW55   | 0.61              |
| HW16   | 0.67              | HW36   | –                 | HW56   | 0.76              |
| HW17   | –                 | HW37   | –                 | HW57   | –                 |
| HW18   | 0.96              | HW38   | –                 | HW58   | 0.43 <sup>b</sup> |
| HW19   | 0.43 <sup>b</sup> | HW39   | –                 | HW59   | 0.52              |
| HW20   | 0.78              | HW40   | –                 | HW60   | –                 |

a. <LOD; b.  $R^2$ <0.50.

**Table S4.** Recoveries determined from spiking experiments.

| CP mixture                                | spiked level (ng) | % recovery in each of the spiking experiments before IS correction <sup>†</sup> |                 |                 |                 |                 |                 |      | % recovery after IS correction |
|-------------------------------------------|-------------------|---------------------------------------------------------------------------------|-----------------|-----------------|-----------------|-----------------|-----------------|------|--------------------------------|
|                                           |                   | 1 <sup>st</sup>                                                                 | 2 <sup>nd</sup> | 3 <sup>rd</sup> | 4 <sup>th</sup> | 5 <sup>th</sup> | 6 <sup>th</sup> | mean | mean                           |
| SCCPs (51.5%Cl + 63.0%Cl)                 | 300 ng + 300 ng   | 75                                                                              | 82              | 82              | –               | –               | –               | 79   | 103                            |
| MCCPs (42.0%Cl + 57.0%Cl)                 | 300 ng + 300 ng   | 61                                                                              | 82              | 79              | –               | –               | –               | 74   | 96                             |
| LCCPs (49.0%Cl)                           | 300 ng            | 103                                                                             | 71              | 48              | –               | –               | –               | 74   | 96                             |
| vSCCPs (CP-52)                            | 9.4 ng*           | –                                                                               | –               | –               | 84              | 70              | 65              | 73   | 100                            |
| <sup>13</sup> C-CP internal standard (IS) | 10 ng             | 77                                                                              | 85              | 70              | 77              | 68              | 74              | 75   | –                              |

\*1000 ng CP-52 was spiked, 0.94% of which was vSCCPs<sup>11</sup>.

<sup>†</sup> IS-corrected recovery = recovery of vS/S/M/LCCPs ÷ recovery of <sup>13</sup>C-CP internal standard (IS), which was calculated in each of the spiking experiments, respectively.

**Table S5.** Gender-specific constants used for the estimation of hand surface area

|        | a      | b     | c      |
|--------|--------|-------|--------|
| male   | 0.0257 | 0.573 | -0.128 |
| female | 0.0131 | 0.412 | 0.0274 |

(Source: U.S. EPA Exposure Factors Handbook<sup>12</sup>)

**Table S6:** Absorption fractions used for exposure assessment

|                    | molecular weight                                                                                                                                                           | Log Kow                  | Absorption fraction | Estimated absorption fraction |
|--------------------|----------------------------------------------------------------------------------------------------------------------------------------------------------------------------|--------------------------|---------------------|-------------------------------|
| <b>vSCCPs</b>      | 335 (C <sub>9</sub> H <sub>14</sub> Cl <sub>6</sub> )                                                                                                                      | 5.99 <sup>13</sup>       |                     | 0.27                          |
| <b>SCCPs</b>       | 363 (C <sub>11</sub> H <sub>18</sub> Cl <sub>6</sub> )                                                                                                                     | 4.10-8.67 <sup>14</sup>  |                     | 0.27                          |
| <b>MCCPs</b>       | 405 (C <sub>14</sub> H <sub>24</sub> Cl <sub>6</sub> )<br>516 (C <sub>17</sub> H <sub>28</sub> Cl <sub>8</sub> )                                                           | 5.56-8.38 <sup>14</sup>  |                     | 0.34                          |
| <b>LCCPs</b>       | 461 (C <sub>18</sub> H <sub>32</sub> Cl <sub>6</sub> )<br>545 (C <sub>24</sub> H <sub>44</sub> Cl <sub>6</sub> )<br>713 (C <sub>36</sub> H <sub>68</sub> Cl <sub>6</sub> ) | 6.58-11.34 <sup>14</sup> |                     | 0.13                          |
| <b>TBP-AE</b>      | 370.8                                                                                                                                                                      | 5.80                     |                     | 0.27                          |
| <b>BDE-28</b>      | 406.9                                                                                                                                                                      | 5.94 <sup>15</sup>       | 0.27 <sup>16</sup>  |                               |
| <b>BDE-47</b>      | 485.8                                                                                                                                                                      | 6.81 <sup>15</sup>       | 0.33 <sup>16</sup>  |                               |
| <b>TBBPA</b>       | 543.9                                                                                                                                                                      | 5.90                     | 0.30 <sup>b</sup>   |                               |
| <b>BDE-99</b>      | 564.7                                                                                                                                                                      | 7.32 <sup>15</sup>       | 0.34 <sup>16</sup>  |                               |
| <b>α-HBCDD</b>     | 641.7                                                                                                                                                                      | 6.78 <sup>17</sup>       | 0.36 <sup>b</sup>   |                               |
| <b>β-HBCDD</b>     | 641.7                                                                                                                                                                      | 6.78 <sup>17</sup>       | 0.31 <sup>b</sup>   |                               |
| <b>γ-HBCDD</b>     | 641.7                                                                                                                                                                      | 6.78 <sup>17</sup>       | 0.27 <sup>b</sup>   |                               |
| <b>BDE-153</b>     | 643.6                                                                                                                                                                      | 7.90 <sup>15</sup>       | 0.37 <sup>16</sup>  |                               |
| <b>anti-DDC-CO</b> | 653.7                                                                                                                                                                      | 11.11 <sup>17</sup>      | 0.09 <sup>a</sup>   |                               |
| <b>syn-DDC-CO</b>  | 653.7                                                                                                                                                                      | 11.11 <sup>17</sup>      | 0.09 <sup>a</sup>   |                               |
| <b>BTBPE</b>       | 687.6                                                                                                                                                                      | 9.41 <sup>17</sup>       | 0.11 <sup>a</sup>   |                               |
| <b>BEH-TEBP</b>    | 706.1                                                                                                                                                                      | 11.04 <sup>17</sup>      | 0.10 <sup>a</sup>   |                               |
| <b>BDE-183</b>     | 722.5                                                                                                                                                                      | 8.27 <sup>15</sup>       | 0.13 <sup>16</sup>  |                               |
| <b>BDE-209</b>     | 959.2                                                                                                                                                                      | 9.97                     | 0.08 <sup>16</sup>  |                               |
| <b>DBDPE</b>       | 971.2                                                                                                                                                                      | 11.96 <sup>17</sup>      | 0.11 <sup>a</sup>   |                               |

<sup>a</sup>: Frederiksen et al. 2016,<sup>17</sup> values were obtained by summing mean distribution of FRs in epidermis and dermis compartments

<sup>b</sup>: Abdallah et al. 2015,<sup>16</sup> values were obtained by summing distribution of FRs in directly absorbed fraction and skin-epidermis (depot)

**Table S7.** Characteristic of the study group/indoor environment questionnaire parameters and the median amounts of CPs (with detection frequencies above 80%) in the hand wipes (ng).

|                                                                      | <i>n</i> | Median (Interquartile Range: IQR) |                |                             |                 |
|----------------------------------------------------------------------|----------|-----------------------------------|----------------|-----------------------------|-----------------|
|                                                                      |          | SCCPs                             | MCCPs          | LCCPs                       | sumCPs          |
| Gender of participants                                               |          |                                   |                |                             |                 |
| Female                                                               | 45       | 180 (97-330)                      | 550 (270-1000) | 140 (64-300)                | 1000 (480-1800) |
| Male                                                                 | 15       | 110 (63-230)                      | 390 (170-890)  | 200 (53-400)                | 640 (360-1500)  |
| % median difference <sup>a</sup>                                     |          | 46                                | 34             | 38                          | 47              |
| Age of participants                                                  |          |                                   |                |                             |                 |
| <41 years old                                                        | 30       | 110 (63-300)                      | 470 (180-960)  | 89 (42-300)                 | 800 (320-1800)  |
| ≥41 years old                                                        | 30       | 180 (110-260)                     | 520 (340-1100) | 210 (85-380)                | 1200 (550-1900) |
| % median difference <sup>a</sup>                                     |          | 46                                | 10             | 79                          | 37              |
| Owning a sofa                                                        |          |                                   |                |                             |                 |
| Yes                                                                  | 45       | 180 (98-330)                      | 630 (300-1200) | 170 (76-420)                | 1300 (510-2200) |
| No                                                                   | 15       | 63 (45-230)                       | 220 (110-500)  | 84 (32-280)                 | 330 (190-1200)  |
| % median difference <sup>a</sup>                                     |          | 97*                               | 95*            | 65                          | 120*            |
| Work mainly in                                                       |          |                                   |                |                             |                 |
| Office                                                               | 40       | 160 (98-270)                      | 480 (280-910)  | 160 (64-320)                | 970 (500-1500)  |
| Lab                                                                  | 20       | 210 (62-460)                      | 720 (180-1500) | 140 (44-410)                | 1400 (310-2600) |
| % median difference <sup>a</sup>                                     |          | 28                                | 39             | 16                          | 33              |
| Percent work time with electrical/electronic equipment               |          |                                   |                |                             |                 |
| <80%                                                                 | 22       | 190 (73-320)                      | 510 (290-1000) | 180 (55-400)                | 1100 (460-1800) |
| 80%-100%                                                             | 38       | 150 (93-280)                      | 480 (260-1000) | 140 (66-340)                | 970 (460-1700)  |
| % median difference <sup>a</sup>                                     |          | 25                                | 4              | 21                          | 11              |
| Work hours                                                           |          |                                   |                |                             |                 |
| ≤ 8 hours                                                            | 45       | 170 (68-280)                      | 500 (260-950)  | 160 (52-410)                | 970 (450-1500)  |
| > 8 hours                                                            | 15       | 180 (110-510)                     | 460 (280-1400) | 140 (83-290)                | 1000 (500-2300) |
| % median difference <sup>a</sup>                                     |          | 8                                 | 7              | 15                          | 6               |
| Residence house/apartment built (data available for 55 participants) |          |                                   |                |                             |                 |
| ≤ 11 years, after the 2002 ban                                       | 8        | 110 (56-230)                      | 400 (260-680)  | 84 (68-250)                 | 710 (390-1100)  |
| > 11 years                                                           | 47       | 180 (90-290)                      | 500 (260-1100) | 150 (58-360)                | 1000 (460-2000) |
| % median difference <sup>a</sup>                                     |          | 52*                               | 22             | 57                          | 37              |
| Size of the home area                                                |          |                                   |                |                             |                 |
| ≤ 80 m <sup>2</sup>                                                  | 23       | 160 (94-310)                      | 470 (250-960)  | 94 (51-250)                 | 930 (370-1500)  |
| 80-120 m <sup>2</sup>                                                | 18       | 190 (73-390)                      | 520 (270-1200) | 190 (54-360)                | 1100 (480-2100) |
| >120 m <sup>2</sup>                                                  | 19       | 160 (92-200)                      | 440 (270-1000) | 220 (87-440)                | 1000 (460-1700) |
| Statistical significance <sup>b</sup>                                |          | <i>p</i> >0.05                    | <i>p</i> >0.05 | <i>p</i> >0.05              | <i>p</i> >0.05  |
| How long people had lived in the home                                |          |                                   |                |                             |                 |
| ≤ 2 years                                                            | 21       | 160 (97-370)                      | 470 (290-1000) | 140 (83-120)                | 970 (480-1800)  |
| 2-6 years                                                            | 20       | 110 (64-210)                      | 460 (160-960)  | 76 (29-270)                 | 680 (300-1400)  |
| >6 years                                                             | 19       | 200 (130-370)                     | 850 (250-1500) | 220 (120-430)               | 1400 (510-2400) |
| Statistical significance <sup>b</sup>                                |          | <i>p</i> >0.05                    | <i>p</i> >0.05 | <i>p</i> >0.05              | <i>p</i> >0.05  |
| No. of children in the home                                          |          |                                   |                |                             |                 |
| 0                                                                    | 30       | 140 (71-260)                      | 420 (240-850)  | 86 (47-200)                 | 690 (350-1400)  |
| 1                                                                    | 11       | 270 (140-430)                     | 880 (450-1300) | 240 (180-1600)              | 1600 (940-3600) |
| >1                                                                   | 19       | 160 (79-270)                      | 520 (240-1200) | 200 (56-440)                | 1100 (450-2000) |
| Statistical significance <sup>b</sup>                                |          | <i>p</i> >0.05                    | <i>p</i> >0.05 | <i>p</i> >0.05              | <i>p</i> <0.05  |
| No. of TVs                                                           |          |                                   |                |                             |                 |
| 0                                                                    | 10       | 180 (97-260)                      | 630 (370-1100) | 160 (47-380)                | 1300 (610-2000) |
| 1                                                                    | 35       | 120 (64-220)                      | 280 (190-850)  | 110 (50-200)                | 510 (330-1300)  |
| >1                                                                   | 15       | 190 (140-280)                     | 720 (360-1400) | 320 (150-450)               | 1200 (760-2300) |
| Statistical significance <sup>b</sup>                                |          | <i>p</i> >0.05                    | <i>p</i> >0.05 | <i>p</i> >0.05 <sup>d</sup> | <i>p</i> >0.05  |

|                                       | <i>n</i> | Median (Interquartile Range: IQR) |                |                |                  |
|---------------------------------------|----------|-----------------------------------|----------------|----------------|------------------|
|                                       |          | SCCPs                             | MCCPs          | LCCPs          | sumCPs           |
| No. of (mobile) phones                |          |                                   |                |                |                  |
| <2                                    | 12       | 110 (62-280)                      | 540 (170-1100) | 93 (42-250)    | 780 (290-1700)   |
| 2                                     | 23       | 180 (97-270)                      | 470 (290-880)  | 190 (83-340)   | 660 (320-1700)   |
| >2                                    | 25       | 180 (89-310)                      | 490 (220-1400) | 150 (64-340)   | 1100 (510-1800)  |
| Statistical significance <sup>b</sup> |          | <i>p</i> >0.05                    | <i>p</i> >0.05 | <i>p</i> >0.05 | <i>p</i> >0.05   |
| No. of laptops/tablets/PCs            |          |                                   |                |                |                  |
| <3                                    | 23       | 190 (95-310)                      | 630 (370-1100) | 160 (47-380)   | 1300 (610-2000)  |
| 3-4                                   | 22       | 120 (64-220)                      | 280 (190-850)  | 110 (50-200)   | 510 (330-1300)   |
| >4                                    | 15       | 190 (130-280)                     | 720 (360-1400) | 320 (150-470)  | 1200 (760-2300)  |
| Statistical significance <sup>b</sup> |          | <i>p</i> >0.05                    | <i>p</i> >0.05 | <i>p</i> >0.05 | <i>p</i> >0.05   |
| Floor material                        |          |                                   |                |                |                  |
| Parquet                               | 42       | 170 (71- 280)                     | 490 (270-1000) | 150 (55-420)   | 950 (480-1800)   |
| Wood                                  | 8        | 210 (110-310)                     | 680 (260-1200) | 120 (58-260)   | 970 (410-1600)   |
| Laminate                              | 5        | 290 (230-490)                     | 960 (950-1800) | 160 (95-220)   | 1400 (1400-2400) |
| Flooring <sup>c</sup>                 | 3        | 110 (100-130)                     | 340 (260-360)  | 190 (120-400)  | 640 (480-900)    |
| Wall-to-wall carpet                   | 1        | 190                               | 720            | 340            | 1200             |
| Other                                 | 1        | 18                                | 51             | 63             | 130              |
| Statistical significance <sup>b</sup> |          | <i>p</i> >0.05                    | <i>p</i> >0.05 | <i>p</i> >0.05 | <i>p</i> >0.05   |

\* *p*<0.05, Mann–Whitney test;

<sup>a</sup> median difference in concentration of two categories in %,  $((A - B)/((A + B)/2)) \times 100$ ;

<sup>b</sup> Kruskal-Wallis test;

<sup>c</sup> floor material which comprises e.g. PVC and linoleum;

<sup>d</sup> *p* < 0.05 and *r* = 0.15 using Spearman rank correlation coefficients.

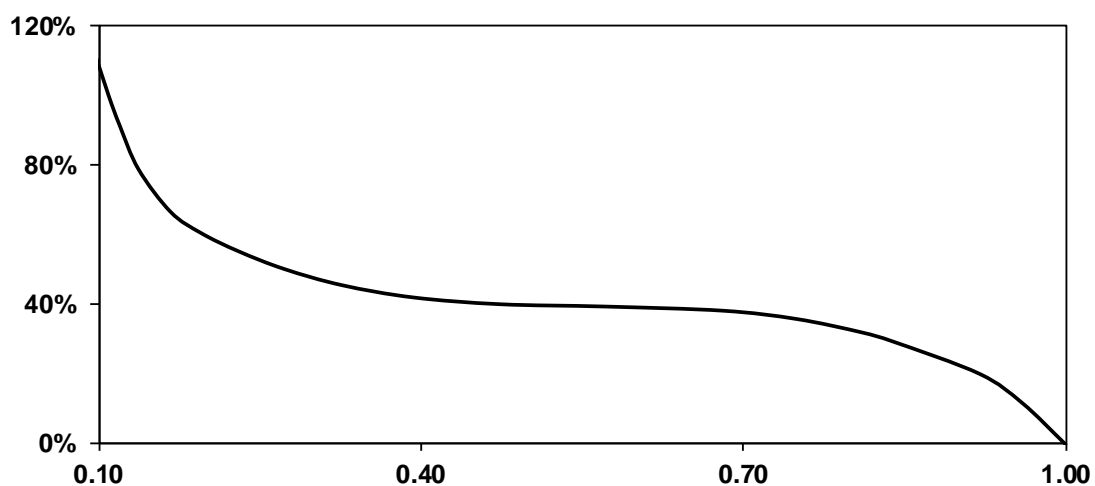

**Figure S1.** Evolution of the mean deviation (%) of calculated concentration from the assigned concentration as a function of the goodness of fit ( $R^2$ ) for a simulation of a mixture of SCCPs 55.5% Cl, MCCPs 52.0% Cl, and LCCPs 49.0% Cl.

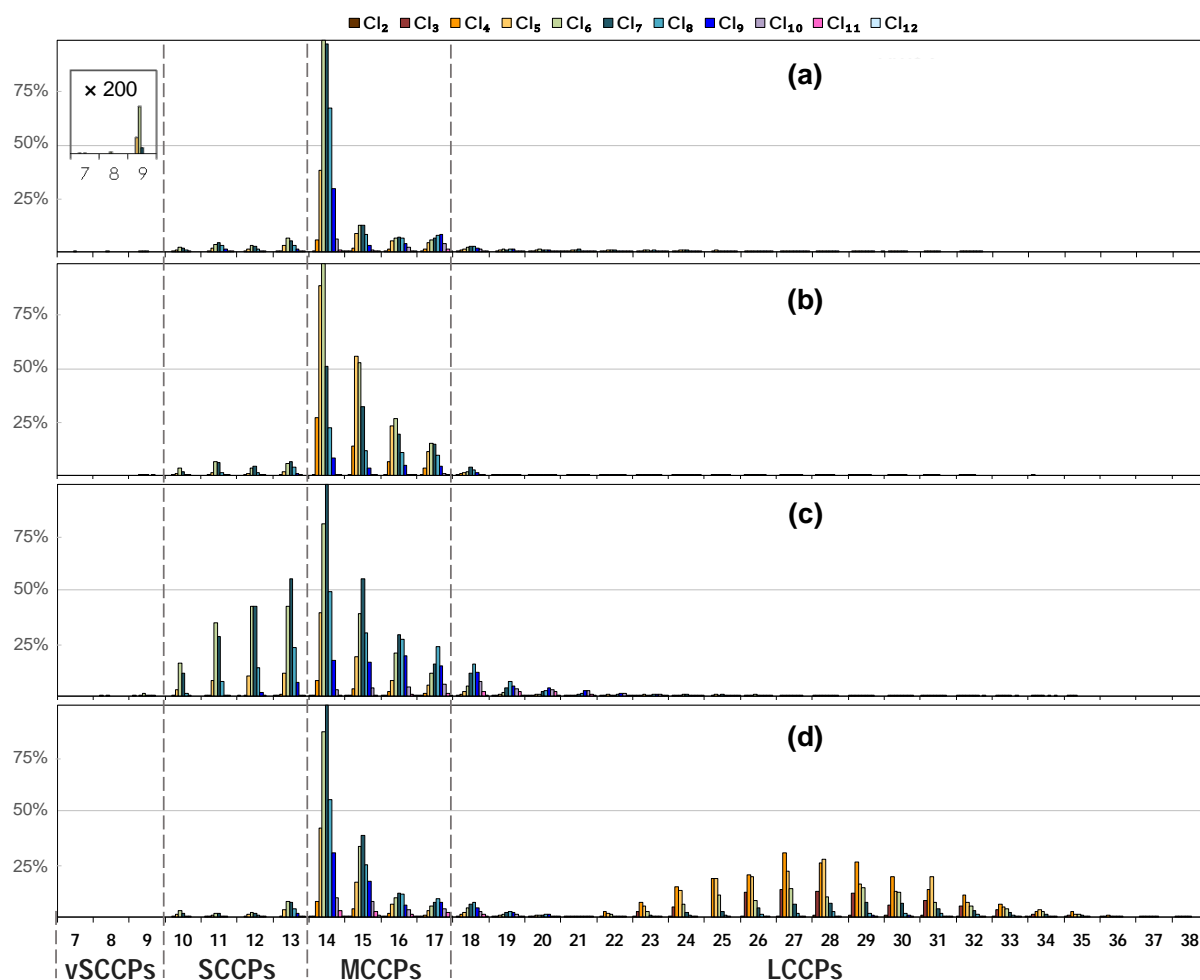

**Figure S2.** Congener group profiles of chlorinated paraffins in selected hand wipes from the Norwegian cohort. The vertical axis represent percent relative abundance; all of the horizontal axis represent carbon chain length.

## References

1. Tomy, G. T.; Stern, G. A.; Muir, D. C. G.; Fisk, A. T.; Cymbalisty, C. D.; Westmore, J. B., Quantifying C-10-C-13 polychloroalkanes in environmental samples by high-resolution gas chromatography electron capture negative ion high resolution mass spectrometry. *Analytical chemistry* **1997**, *69*, (14), 2762-2771.
2. Coelhan, M.; Saraci, M.; Parlar, H., A comparative study of polychlorinated alkanes as standards for the determination of C10-C13 polychlorinated paraffines in fish samples. *Chemosphere* **2000**, *40*, (6), 685-689.
3. Du, X.; Yuan, B.; Zhou, Y.; Benskin, J. P.; Qiu, Y.; Yin, G.; Zhao, J., Short-, Medium-, and Long-Chain Chlorinated Paraffins in Wildlife from Paddy Fields in the Yangtze River Delta. *Environmental Science & Technology* **2018**, *52*, (3), 1072-1080.
4. Bogdal, C.; Alsberg, T.; Diefenbacher, P. S.; MacLeod, M.; Berger, U., Fast quantification of chlorinated paraffins in environmental samples by direct injection high-resolution mass spectrometry with pattern deconvolution. *Analytical chemistry* **2015**, *87*, (5), 2852-60.
5. Brandsma, S. H.; van Mourik, L.; O'Brien, J. W.; Eaglesham, G.; Leonards, P. E.; de Boer, J.; Gallen, C.; Mueller, J.; Gaus, C.; Bogdal, C., Medium-Chain Chlorinated Paraffins (CPs) Dominate in Australian Sewage Sludge. *Environ Sci Technol* **2017**, *51*, (6), 3364-3372.
6. Krätschmer, K.; Schächtele, A., Interlaboratory studies on chlorinated paraffins: Evaluation of different methods for food matrices. *Chemosphere* **2019**, *234*, 252-259.
7. Tay, J. H.; Sellström, U.; Papadopoulou, E.; Padilla-Sánchez, J. A.; Haug, L. S.; de Wit, C. A., Assessment of dermal exposure to halogenated flame retardants: Comparison using direct measurements from hand wipes with an indirect estimation from settled dust concentrations. *Environment International* **2018**, *115*, 285-294.
8. Poonthong, S.; Padilla-Sánchez, J. A.; Papadopoulou, E.; Giovanoulis, G.; Thomsen, C.; Haug, L. S., Hand Wipes: A Useful Tool for Assessing Human Exposure to Poly- and Perfluoroalkyl Substances (PFASs) through Hand-to-Mouth and Dermal Contacts. *Environmental Science & Technology* **2019**, *53*, (4), 1985-1993.
9. Xu, F.; Giovanoulis, G.; van Waes, S.; Padilla-Sanchez, J. A.; Papadopoulou, E.; Magnér, J.; Haug, L. S.; Neels, H.; Covaci, A., Comprehensive Study of Human External Exposure to Organophosphate Flame Retardants via Air, Dust, and Hand Wipes: The Importance of Sampling and Assessment Strategy. *Environmental Science & Technology* **2016**, *50*, (14), 7752-7760.
10. Giovanoulis, G.; Bui, T.; Xu, F.; Papadopoulou, E.; Padilla-Sanchez, J. A.; Covaci, A.; Haug, L. S.; Cousins, A. P.; Magnér, J.; Cousins, I. T.; de Wit, C. A., Multi-pathway human exposure assessment of phthalate esters and DINCH. *Environment International* **2018**, *112*, 115-126.
11. Zhou, Y.; de Wit, C. A.; Yin, G.; Du, X.; Yuan, B., Shorter than short-chain: Very short-chain chlorinated paraffins (vSCCPs) found in wildlife from the Yangtze River Delta. *Environment International* **2019**, *130*, 104955.
12. USEPA, Exposure Factors Handbook; EPA/600/R-09/052F. . In 2011.
13. Xia, D.; Gao, L.; Zheng, M.; Sun, Y.; Qiao, L.; Huang, H.; Zhang, H.; Fu, J.; Wu, Y.; Li, J.; Zhang, L., Identification and evaluation of chlorinated nonane paraffins in the environment: A persistent organic pollutant candidate for the Stockholm Convention? *Journal of Hazardous Materials* **2019**, *371*, 449-455.
14. Hilger, B.; Fromme, H.; Volkel, W.; Coelhan, M., Effects of Chain Length, Chlorination Degree, and Structure on the Octanol-Water Partition Coefficients of Polychlorinated n-Alkanes. *Environm Sci Technol* **2011**, *45*, (7), 2842-2849.
15. Braekevelt, E.; Tittlemier, S. A.; Tomy, G. T., Direct measurement of octanol–water partition coefficients of some environmentally relevant brominated diphenyl ether congeners. *Chemosphere* **2003**, *51*, (7), 563-567.
16. Abdallah, M. A.-E.; Pawar, G.; Harrad, S., Effect of Bromine Substitution on Human Dermal Absorption of Polybrominated Diphenyl Ethers. *Environ. Sci. Technol.* **2015**, *49*, (18), 10976-10983.
17. Frederiksen, M.; Vorkamp, K.; Jensen, N. M.; Sørensen, J. A.; Knudsen, L. E.; Sørensen, L. S.; Webster, T. F.; Nielsen, J. B., Dermal uptake and percutaneous penetration of ten flame retardants in a human skin ex vivo model. *Chemosphere* **2016**, *162*, 308-314.
